# Supplementary material for: The Developmental Intestinal Regulator ELT-2 Controls p38-Dependent Immune Responses in Adult C. elegans
Source: PubMed Central journal article supplement (PMC4446034; doi:10.1371/journal.pgen.1005265), 2015-05-27

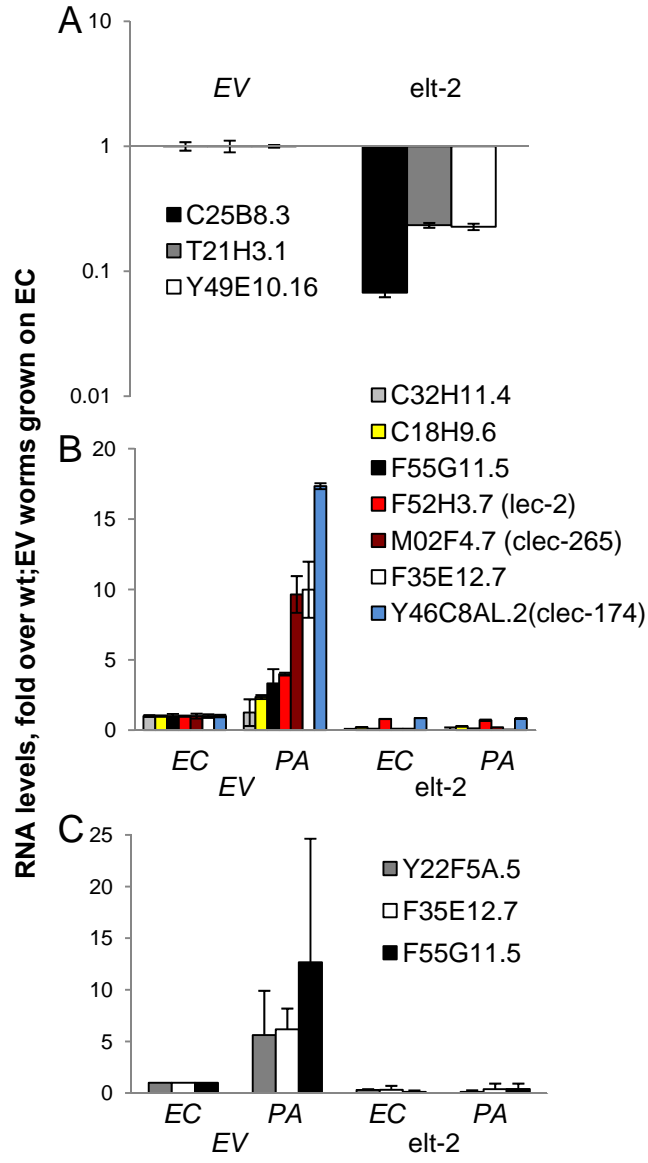

Supplement: pgen.1005265.s002.pdf [file pgen.1005265.s002.pdf]
